# Supplementary material for: Suppression of PI3K/Akt/mTOR/c-Myc/mtp53 Positive Feedback Loop Induces Cell Cycle Arrest by Dual PI3K/mTOR Inhibitor PQR309 in Endometrial Cancer Cell Lines
Source: MDPI journal article supplement (doi:10.3390/cells10112916), 2021-10-27
Supplement: s1 [file s1]

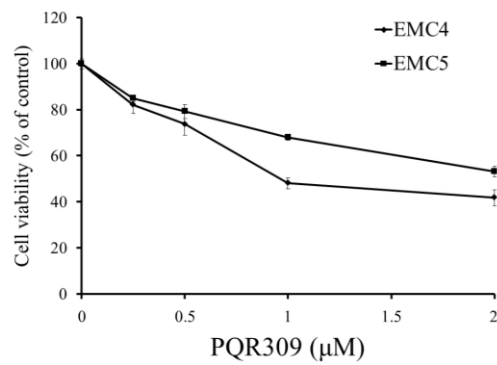

Supplementary Figure S1. Effect of PQR309 on cell viability of primary endometrial cancer cells

EMC4 and EMC5 cells ( $5 \times 10^3$  cells/well of 96-well plate) were treated with various concentrations of PQR309 (0, 0.25, 0.5, 1 and 2  $\mu\text{M}$ ) for 72 h. Cell viability was analyzed by MTT assay.

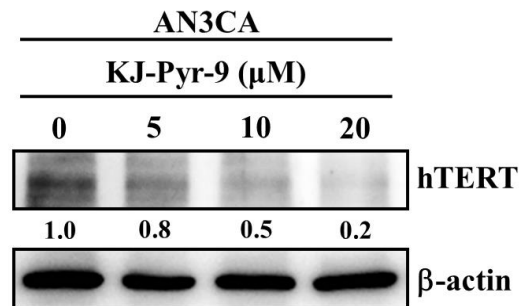

Supplementary Figure S2. Effect of KJ-Pyr-9 on hTERT expression in AN3CA cells

Western blot assay was performed to detect the expressions of hTERT in AN3CA cells after KJ-Pyr-9 treatment for 48h. Software ImageJ was used to quantify the band intensities of hTERT. Data shown are the relative expression standardized by the  $\beta$ -actin protein level. The ratio of cells without treatment was set at 1.
